# Supplementary material for: Synthesis, characterisation and application of imidazolium based ionic liquid modified montmorillonite sorbents for the removal of amaranth dye
Source: Royal Society of Chemistry journal article supplement (doi:10.1039/c5ra09483f), 2015-01-01
Supplement: c5ra09483f1.pdf [file c5ra09483f1.pdf]

Supporting documents

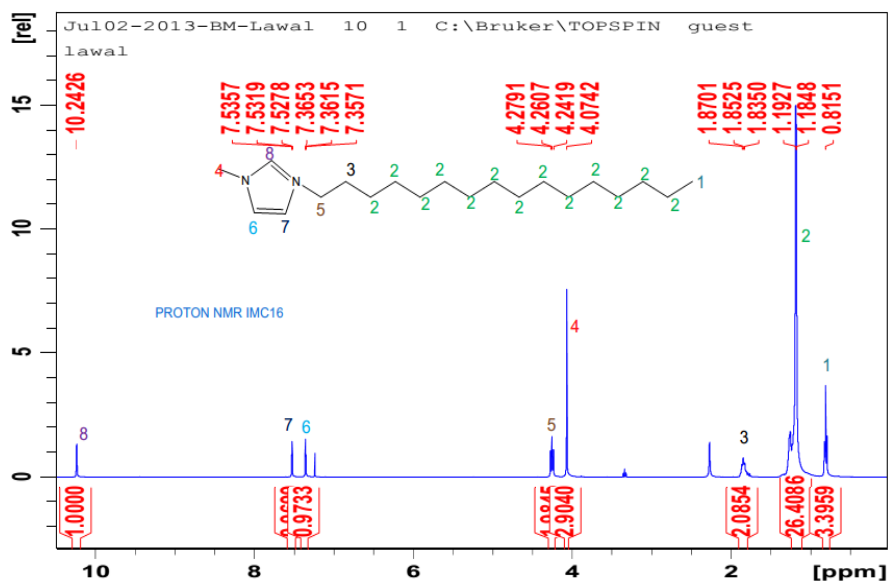

Fig. S1  $^1\text{H}$  NMR of 1- methyl, 3-decahexyl imidazolium

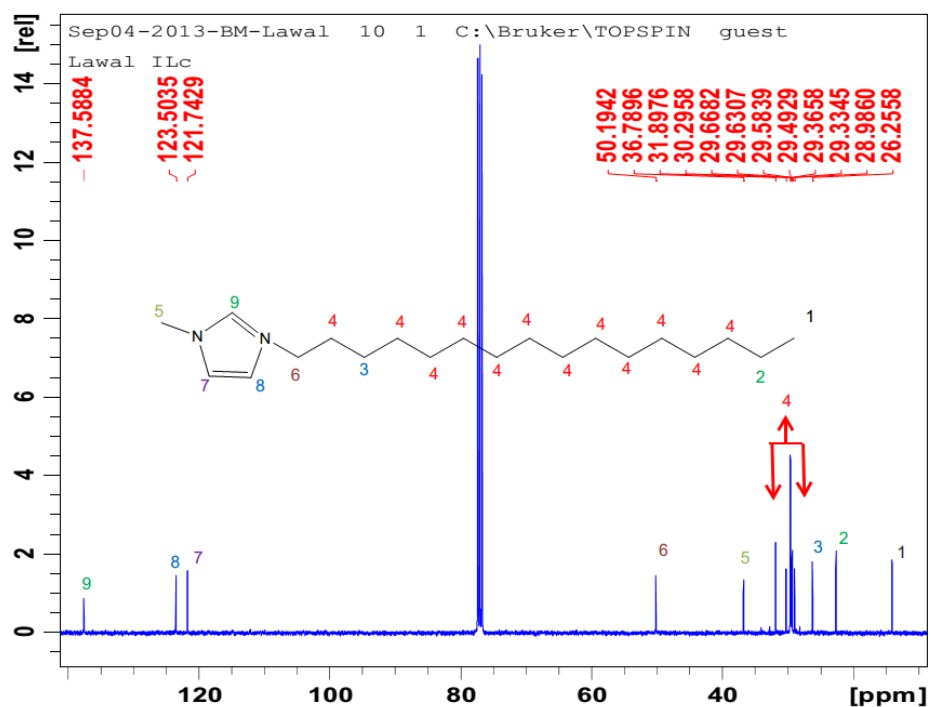

Fig. S2  $^{13}\text{C}$  NMR of 1- methyl, 3-decahexyl imidazolium

Single Mass Analysis

Tolerance = 5.0 PPM / DBE: min = -1.5, max = 100.0

Element prediction: Off

Number of isotope peaks used for i-FIT = 3

Monoisotopic Mass, Even Electron Ions

3 formula(e) evaluated with 1 results within limits (up to 20 closest results for each mass)

Elements Used:

C: 15-20 H: 35-40 N: 0-5

Sample 1 36 (1.180) Cm (1:61)

TOF MS ES+

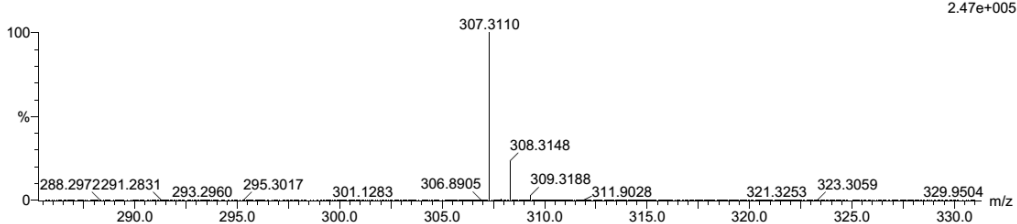

Minimum:

Maximum:

5.0

5.0

-1.5

100.0

Mass

Calc. Mass

mDa

PPM

DBE

i-FIT

i-FIT (Norm)

Formula

307.3110

307.3113

-0.3

-1.0

2.5

666.1

0.0

C20 H39 N2

Fig. S3 HR-MS of 1- methyl, 3-decahexyl imidazolium

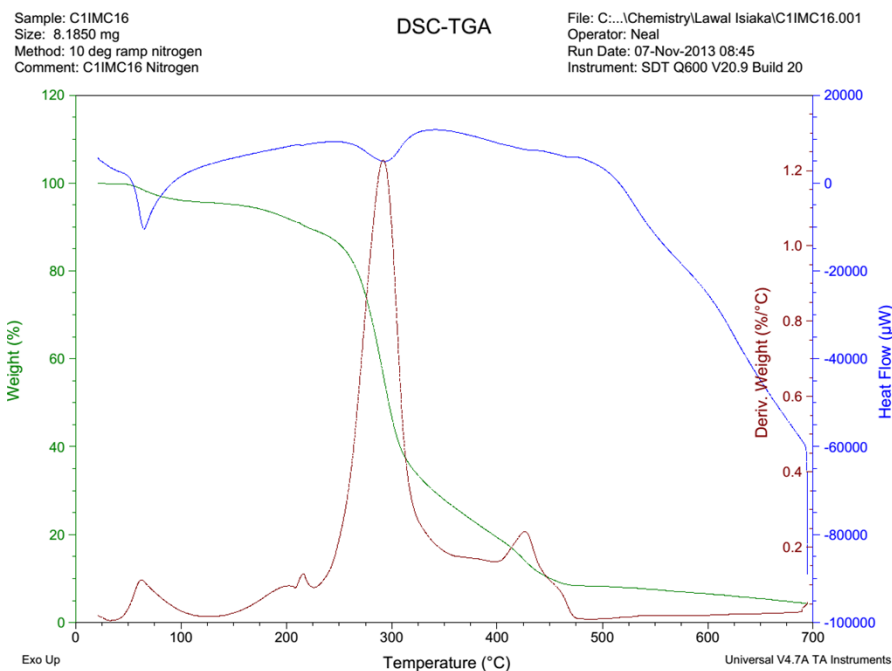

Fig. S4 TGA-DSC of 1- methyl, 3-decahexyl imidazolium

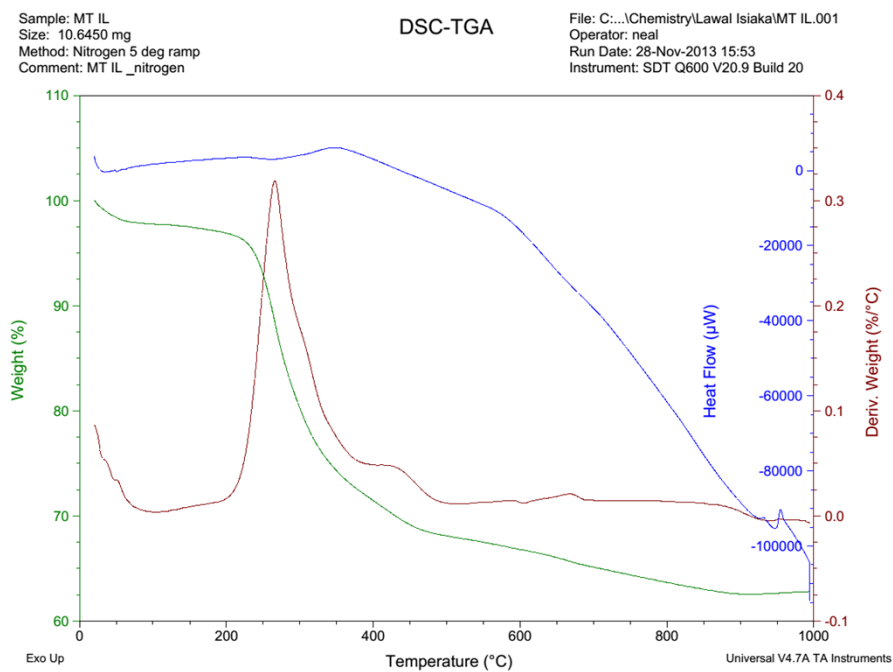

Fig. S5 TGA-DSC of Mt-IL
